# Supplementary material
Source: Springer Nature journal article supplement (https://www.springermedizin.de/resource/supplementary/12936_2011_1903_MOESM2_ESM.pdf/9541998)

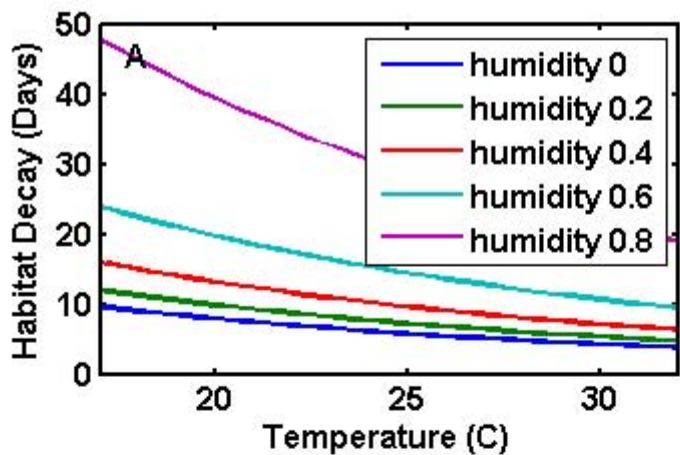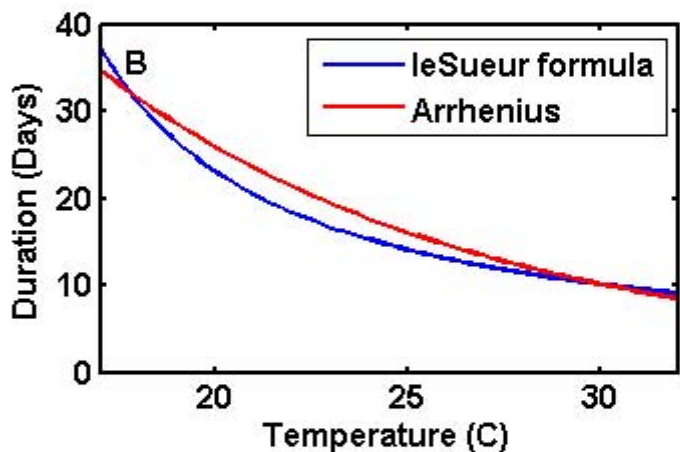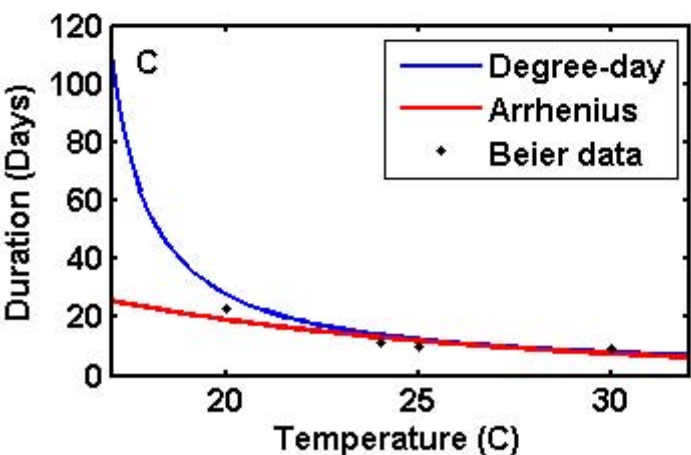

Supplement: MOESM2 [file 9541998]
